# Supplementary material
Source: PubMed Central journal article supplement (PMC3844433)

## Supplementary information

**Figure S1:** Histological characterization (H&E staining) of rat (a, f) lung, (b, g) brain, (c, h) kidney, (d, i) liver and (e, j) spleen after Gd-SWCNTs or Fe-SWCNT treatment (0.5mg/kg b.wt, i.v) at day 5. The Gd-SWCNTs and Fe-SWCNT were present as aggregates (red arrows) in the alveolar epithelial lining of the lungs, in the cerebral cortex of brain, in the proximal tubules of the kidney, in the hepatocytes of liver, red pulp of spleen. The histological specimens do not show any signs of inflammation or tissue architectural damage.

### Ultrastructural localization of Gd-SWCNTs in liver by transmission electron microscopy (TEM)

TEM (Figure S2) was performed to characterize the ultra-structural accumulation of the Gd-SWCNTs in the liver cells. Their accumulation was further corroborated by confocal Raman imaging (Figure S3). The TEM analysis of the histological specimens at day 1 (Figure S2a), and day 5 (Figure S2b,c) did not reveal any ultra-structural changes to the liver cells. The images show normal cellular morphology with numerous mitochondria (characteristic feature of liver), nucleus, and endoplasmic reticulum. Day 1 post injection, the Gd-SWCNT are present as small (green arrows), or large (red arrow) aggregates mainly in the endosomes (brown arrows) (Figure 2a). The sub-cellular localization of Gd-SWCNTs is similar to other previous *in vitro* reports with SWCNTs.<sup>1,2</sup> Day 5 post injection, the Gd-SWCNTs aggregates were also surrounded by a large number of mitochondria (Figure 2b,c). Mitochondria play a major role in metabolism of xenobiotic compounds by induction of cytochrome p450 enzymes, majority of which are also present in the endosomes.<sup>3,4</sup>

Confocal Raman microscopy was performed to confirm, and corroborate the presence of Gd-SWCNTs in the liver tissue samples (Figure S3). Figure S3A shows an optical image of liver tissue section after day 1 treatment with Gd-SWCNTs. Raman spectra were obtained from a few selected points (red dots in Figure S3B) in the region of Gd-SWCNTs aggregates (red cross in Figure S3A). This region shows the characteristic G-band ( $1596\text{ cm}^{-1}$ ) Raman peak of SWCNTs (Figure S3C). Figure S3D shows a Raman G-band intensity map of SWCNTs in the liver tissue section. Figure S3E shows the overlay of the Raman G-band intensity map (Figure S3D) on the optical image confirming the presence of Gd-SWCNTs. Other prominent peaks observed in the spectra were from compounds found in normal liver tissue and paraffin (Suppl info: Table S2).

**Figure S2:** Ultrastructural localization of Gd-SWCNTs (0.5 mg/kg b.wt, i.v) in liver tissue before and after treatment at day 1 and day 5. (a) Representative TEM image histological specimen of Gd-SWCNT at day 1, (b) Gd-SWCNT at day 5, and (c) magnified region of image b. The image (a) shows many mitochondria (M), a characteristic feature of hepatic tissue, and normal nucleus (N) of a hepatocyte. The Gd-SWCNTs are clearly internalized in the endosomes/vacuoles (brown arrows) of the hepatocyte (red arrows). The regions of Gd-SWCNT internalized vacuoles appear to be surrounded by many mitochondria.

**Figure S3:** Raman spectra and G band intensity map of Gd-SWCNTs in rat liver. A) bright field image of the unstained liver tissue after 1 day treatment of Gd-SWCNT (0.5mg/kg b.wt, i.v). B) In liver tissue, Raman G-band intensity was acquired at different spots (marked as red points) for the nanotubes for their localization. (C) Raman spectra of Gd-SWCNTs uptaken by the liver

cells. (D) Area map of Raman G-band intensity of Gd-SWCNTs in liver cells. (E & F) Area map of the Raman G-band intensity of Gd-SWCNTs in liver cells overlaid on optical micrograph of the same region.

**Supplementary Table S1:** Characteristic Raman peaks of Gd-SWCNT aggregate in the liver tissue

|                       |                                 |
|-----------------------|---------------------------------|
| 748 cm <sup>-1</sup>  | DNA                             |
| 1000 cm <sup>-1</sup> | Phenylalanine bound & free NADH |
| 1117 cm <sup>-1</sup> | Glucose                         |
| 1155 cm <sup>-1</sup> | Glycogen                        |
| 1300 cm <sup>-1</sup> | Phospholipids                   |
| 1378 cm <sup>-1</sup> | Paraffin                        |
| 1596 cm <sup>-1</sup> | Gd-SWCNTs                       |
| 1618 cm <sup>-1</sup> | Tryptophan                      |

**Supplementary Table S2:** Expressed gene categories in liver associated with 0.5mg/kg.b.wt of (a) Gd-SWCNTs and (b) Fe-SWCNTs administration for one day as compared to control. The expressed genes having more than 2 fold change as compared to control ( $p < 0.05$ ) are selected and represented as either up-regulated or down-regulated.

(a) A total of 42 genes got effected after day 1 treatment with Gd-SWCNTs, of which 30 genes are up-regulated (9 of which are not yet characterized) and 12 genes down-regulated (3 of which are not yet characterized). The data shown in table represents the genes that characterized.

| Ref Seq Transcript ID                             | Gene Symbol | Description                                                                              | Expression   |
|---------------------------------------------------|-------------|------------------------------------------------------------------------------------------|--------------|
| NM_053774                                         | Usp2        | ubiquitin specific peptidase 2, Usp2                                                     | Up-regulated |
| NM_052798                                         | Zfp354a     | zinc finger protein 354A, Zfp354a                                                        | Up-regulated |
| NM_134383 ///<br>XM_001075165                     | Elov16      | ELOVL family member 6, elongation of long chain fatty acids (yeast), Elov16              | Up-regulated |
| NM_145677                                         | Slc25a25    | solute carrier family 25 (mitochondrial carrier, phosphate carrier), member 25, Slc25a25 | Up-regulated |
| NM_053962                                         | Sds         | serine dehydratase, Sds                                                                  | Up-regulated |
| NM_031678                                         | Per2        | period homolog 2 (Drosophila), Per2                                                      | Up-regulated |
| NM_001106683 ///<br>XM_001054640 ///<br>XM_216525 | Mfsd2       | major facilitator superfamily domain containing 2, Mfsd2                                 | Up-regulated |
| NM_017332                                         | Fasn        | fatty acid synthase, Fasn                                                                | Up-regulated |
| NM_012543                                         | Dbp         | D site albumin promoter binding protein, Dbp                                             | Up-regulated |
| NM_139192                                         | Scd1        | stearoyl-Coenzyme A desaturase 1, Scd1                                                   | Up-regulated |
| NM_134383 ///<br>XM_001075165                     | Elov16      | ELOVL family member 6, elongation of long chain fatty acids (yeast), Elov16              | Up-regulated |
| NM_022671                                         | Onecut1     | one cut domain, family member 1, Onecut1                                                 | Up-regulated |
| NM_001108180 ///<br>XM_001071908 ///<br>XM_236571 | Ky          | kyphoscoliosis peptidase, Ky                                                             | Up-regulated |
| NM_134449                                         | Prkcdpb     | protein kinase C, delta binding protein, Prkcdpb                                         | Up-regulated |
| NM_001009671                                      | Coq10b      | coenzyme Q10 homolog B (S. cerevisiae), Coq10b                                           | Up-regulated |
| NM_017332                                         | Fasn        | fatty acid synthase, Fasn                                                                | Up-regulated |
| NM_058209                                         | Zfp37       | zinc finger protein 37, Zfp37                                                            | Up-regulated |
| NM_031741 ///<br>XM_001075869                     | Slc2a5      | solute carrier family 2 (facilitated glucose/fructose transporter), member 5, Slc2a5     | Up-regulated |
| NM_001108797 ///                                  | Fam117b     | amyotrophic lateral sclerosis 2 (juvenile) chromosome                                    | Up-regulated |

|                                                                                           |                      |                                                                                                                                  |                |
|-------------------------------------------------------------------------------------------|----------------------|----------------------------------------------------------------------------------------------------------------------------------|----------------|
| XM_001069873 ///<br>XM_343576                                                             |                      | region, candidate 13, Als2cr13                                                                                                   |                |
| NM_019242                                                                                 | Ifrd1                | Interferon-related developmental regulator 1, Ifrd1                                                                              | Up-regulated   |
| NM_001106983 ///<br>XM_001056587 ///<br>XM_220209                                         | Prss32               | Protease, serine, 32 (predicted), Prss32_predicted                                                                               | Up-regulated   |
| NM_012551                                                                                 | Egr1                 | early growth response 1, Egr1                                                                                                    | Down-regulated |
| NM_017206                                                                                 | Slc6a6               | solute carrier family 6 (neurotransmitter transporter, taurine), member 6, Slc6a6                                                | Down-regulated |
| NM_138504                                                                                 | Osgin1               | oxidative stress induced growth inhibitor 1, Osgin1                                                                              | Down-regulated |
| NM_173322                                                                                 | Pnrc1                | proline-rich nuclear receptor coactivator 1, Pnrc1                                                                               | Down-regulated |
| NM_024362                                                                                 | Arntl                | aryl hydrocarbon receptor nuclear translocator-like, Arntl                                                                       | Down-regulated |
| NM_030845                                                                                 | Cxcl1                | chemokine (C-X-C motif) ligand 1, Cxcl1                                                                                          | Down-regulated |
| NM_001134844 ///<br>XM_001062335 ///<br>XM_001070917 ///<br>XM_001070953 ///<br>XM_341808 | Cyp2b1 ///<br>Cyp2b2 | cytochrome P450, family 2, subfamily b, polypeptide 2<br>/// similar to Cytochrome P450 2B12 (CYPIIB12),<br>Cyp2b2 /// LOC687222 | Down-regulated |
| NM_001107084 ///<br>XM_001055978 ///<br>XM_221333                                         | Bcl6                 | B-cell leukemia/lymphoma 6 (predicted),<br>Bcl6_predicted                                                                        | Down-regulated |
| NM_001106834 ///<br>XM_001056334 ///<br>XM_001056400 ///<br>XM_001056458 ///<br>XM_217192 | Rora                 | RAR-related orphan receptor alpha (predicted),<br>Rora_predicted                                                                 | Down-regulated |

(b) A total of 15 genes got effected after day 1 treatment with Fe-SWCNTs, of which 10 genes are up-regulated (2 of which are not yet characterized) and 5 genes down-regulated (3 of which are not yet characterized). The data shown in table represents the genes that characterized.

| RefSeq Transcript ID                              | Gene Symbol | Gene Title                                                                     | Expression     |
|---------------------------------------------------|-------------|--------------------------------------------------------------------------------|----------------|
| NM_022671                                         | Onecut1     | one cut homeobox 1                                                             | Up-regulated   |
| NM_001013187                                      | Slc25a30    | Solute carrier family 25, member 30                                            | Up-regulated   |
| NM_145677                                         | Slc25a25    | solute carrier family 25 (mitochondrial carrier, phosphate carrier), member 25 | Up-regulated   |
| NM_139192                                         | Scd1        | stearoyl-Coenzyme A desaturase 1                                               | Up-regulated   |
| NM_144755                                         | Trib3       | tribbles homolog 3 (Drosophila)                                                | Up-regulated   |
| NM_053962                                         | Sds         | serine dehydratase                                                             | Up-regulated   |
| NM_001107084 ///<br>XM_001055978 ///<br>XM_221333 | Bcl6        | B-cell CLL/lymphoma 6                                                          | Down-regulated |
| NM_030845                                         | Cxcl1       | chemokine (C-X-C motif) ligand 1 (melanoma growth stimulating activity, alpha) | Down-regulated |

## References

- (1) Avti, P. K.; Sitharaman, B. *Int J Nanomedicine* **2012**, *7*, 1953.
- (2) Cherukuri, P.; Bachilo, S. M.; Litovsky, S. H.; Weisman, R. B. *J Am Chem Soc* **2004**, *126*, 15638.
- (3) Omura, T. *Chem Biol Interact* **2006**, *163*, 86.
- (4) Anandatheerthavarada, H. K.; Addya, S.; Dwivedi, R. S.; Biswas, G.; Mullick, J.; Avadhani, N. G. *Arch Biochem Biophys* **1997**, *339*, 136.

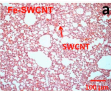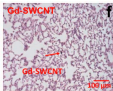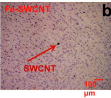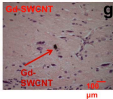

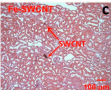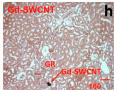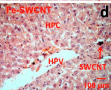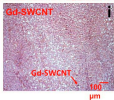



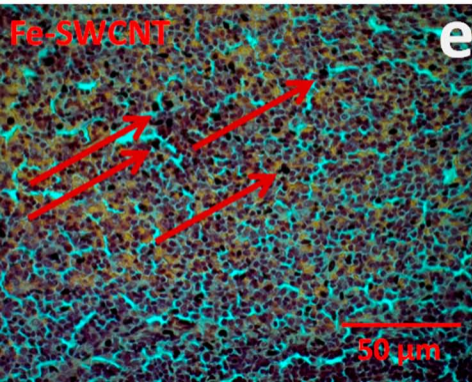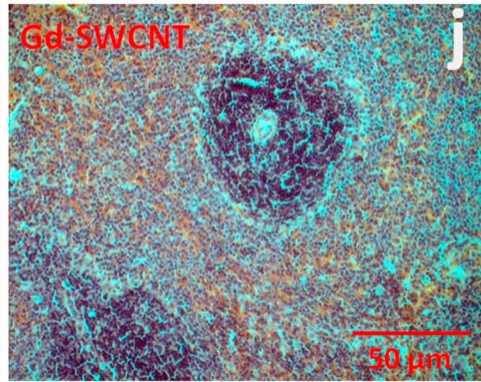

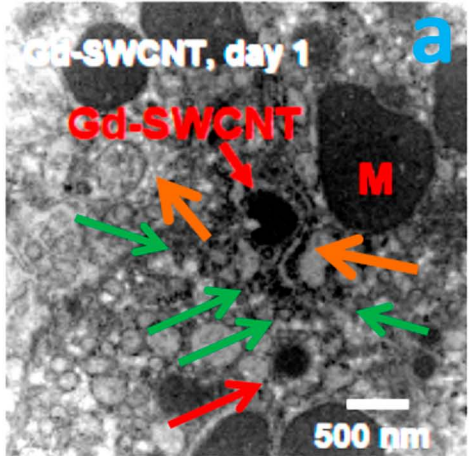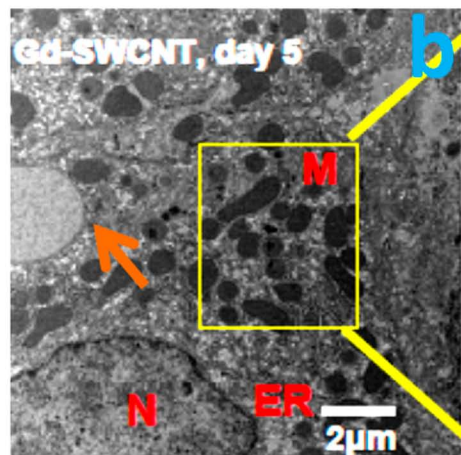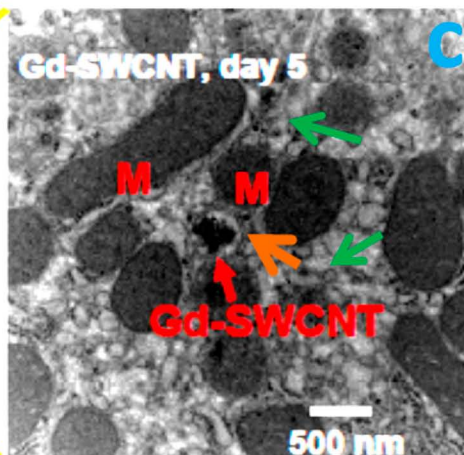

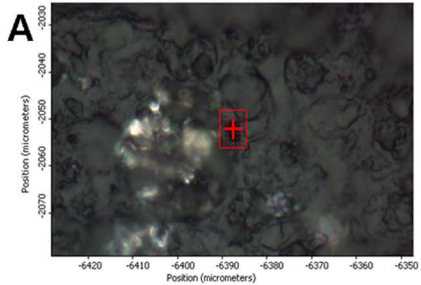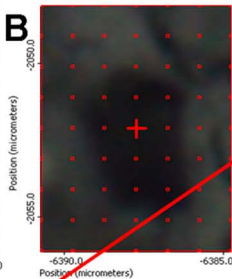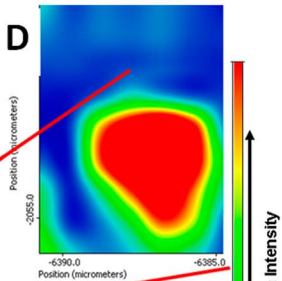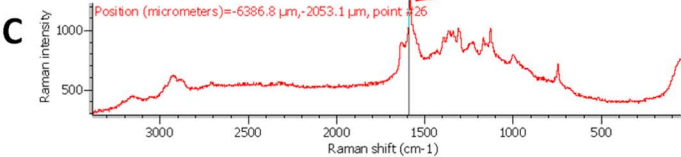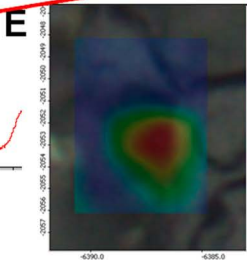

Supplement: NIHMS486463-supplement-1.pdf [file NIHMS486463-supplement-1.pdf]
